# Supplementary material
Source: Springer Nature journal article supplement (https://www.springermedizin.de/resource/supplementary/12931_2011_1093_MOESM2_ESM.pdf/9425638)

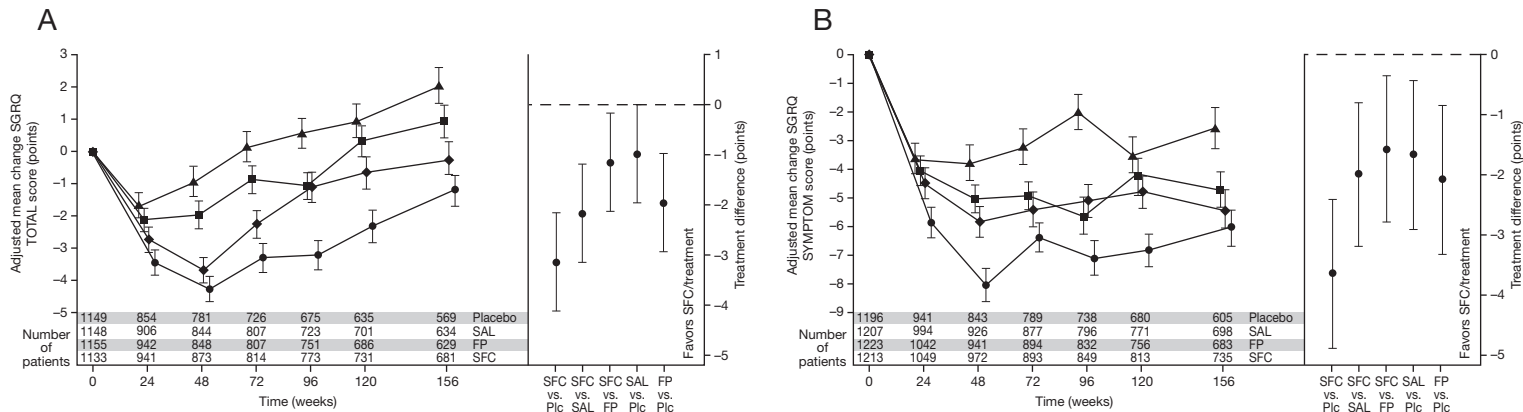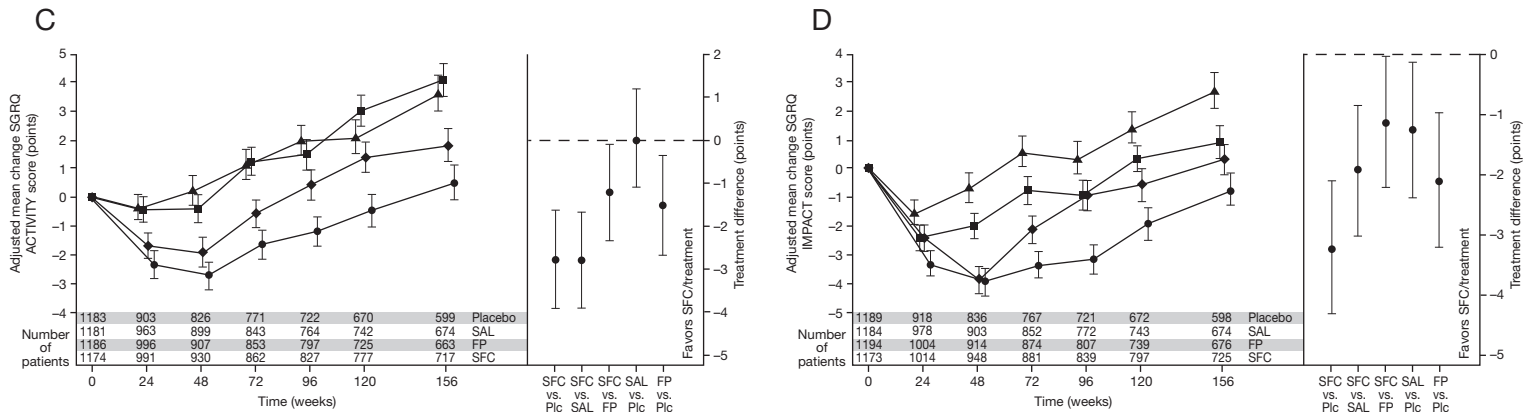

Treatment:    ▲▲ Placebo    ■■ SAL 50    ◆◆ FP 500    ●● SFC 50/500

Supplement: MOESM2 [file 9425638]
